# Supplementary material for: The proto-oncoprotein FBI-1 interacts with MBD3 to recruit the Mi-2/NuRD-HDAC complex and BCoR and to silence p21WAF/CDKN1A by DNA methylation
Source: PubMed Central journal article supplement (PMC3711425; doi:10.1093/nar/gkt359), 2013-05-08
Supplement: supp_gkt359_Supplemental_Data_Upload_20130426_OUP_edited.pdf [file supp_gkt359_Supplemental_Data_Upload_20130426_OUP_edited.pdf]

## **SUPPLEMENTARY INFORMATION**

**The proto-oncoprotein FBI-1 interacts with MBD3 to recruit the Mi-2/NuRD-HDAC complex and BCoR and to silence *p21WAF/CDKN1A* by DNA methylation**

**Won-Il Choi, Bu-Nam Jeon, Jae-Hyeon Yoon, Dong-In Koh, Myung-Hwa Kim, Mi-Young Yu, Kyung-Mi Lee, Youngsoo Kim, Kyunggon Kim, Sujin Susanne Hur, Choong-Eun Lee, Kyung-Sup Kim, and Man-Wook Hur\***

**SUPPLEMENTAL MATERIALS & METHODS**

**SUPPLEMENATRY FIGURE & LEGENDS**

## **SUPPLEMENTARY MATERIALS AND METHODS.**

### **Cell culture/stable cell line**

HEK293 cells were cultured in Dulbecco's modified eagle medium (DMEM, Gibco-BRL, Gaithersburg, MD) supplemented with 10% FBS at 37°C, 5% CO<sub>2</sub>. Primary human dermal fibroblast neonatal (HDFn) cells were cultured in Medium 106 (Gibco-BRL, Gaithersburg, MD) supplemented with Low Serum Growth Supplement (LSGS; Gibco-BRL, Gaithersburg, MD) in the absence of antibiotics and antimycotics at 37 °C, 5% CO<sub>2</sub>. Drosophila SL2 cells were cultured in Schneider's Drosophila medium (Gibco-BRL, Gaithersburg, MD) supplemented with 10% FBS.

Stable HEK293TRex-FBI-1 cells inducible by doxycycline were used to express Flag-FBI-1. The stable cells were cultured in medium containing 1 µg/ml doxycycline for the intended period of time.

### **Inducible HEK293Trex-FLAG-FBI-1 cell preparation**

Nuclear extract was prepared from the HEK293TrexFlag-FBI-1 cells that stably over express FBI-1. To prepare stable cell, FLAG tagged FBI-1 in the pcDNA5/FRT/TO expression vector and pOG44 were co-transfected into the Flp-In<sup>TM</sup>T-RE<sub>X</sub><sup>TM</sup>293T cells (Invitrogen, Carlsbad, CA). T-RE<sub>X</sub>-FBI-1 cells were selected by blasticidin and hygromycin and FBI-1 expression was induced by doxycycline. To isolate nuclear protein complexes that interact with FBI-1 from doxycycline inducible stable HEK293-TRE<sub>X</sub>-FLAG FBI-1 cells, FBI-1 expression was induced overnight and the nuclei were separated by glycerol gradient centrifugation.

### **Western blot analysis**

HEK293 Flp-In<sup>TM</sup> T-RE<sub>X</sub><sup>TM</sup> FBI-1 overexpressing FBI-1 cells were harvested and lysed in TEN buffer (10 mM Tris-HCl pH 8.0, 1 mM EDTA, and 0.1 M NaCl). Cell extracts (40 µg) were separated by a 10% SDS-PAGE. Proteins were transferred onto an Immun-Blot<sup>TM</sup> PVDF membrane (Bio-Rad, Richmond, CA) and blocked with 5% skim milk (BD Biosciences, Oxford, UK) in TBST (20 mM Tris-HCl pH 7.5, 140 mM NaCl, and 0.001% Tween 20) for 10 min. Blotted membranes were incubated with antibody against FBI-1 (Sigma, St. Louis, MO) at 4°C for overnight. Membranes were washed three times with TBST for 10 min each and incubated with horseradish peroxidase-conjugated anti-goat IgG (Santa Cruz Biotechnology, Santa Cruz, CA) antibody. Blots were washed with TBST three times and developed with ECL solution (PerkinElmer, Foster City, CA).

### **Preparation of nuclear extract**

HEK293 Flp-In<sup>TM</sup> T-RE<sub>X</sub><sup>TM</sup> FBI-1 stable cells were harvested from cell culture media by

centrifugation for 10 min at  $15.4 \times g$  (2,000 rpm, Eppendorf centrifuge 5810R, Germany). The cells were resuspended in five packed cell pellet volumes of buffer A (10 mM HEPES (pH 7.9 at 4°C), 1.5 mM MgCl<sub>2</sub>, 10 mM KCl and 0.5 mM DTT) and lysed by 10 strokes of a glass Dounce homogeniser (loose type, Wheaton, Millville, NJ). The homogenate was centrifuged for 10 min at  $15.4 \times g$  to collect the nuclear pellet. The pellet was resuspended in buffer C [20 mM HEPES (pH 7.9), 25% (v/v) glycerol, 0.42 M NaCl, 1.5 mM MgCl<sub>2</sub>, 0.2 mM EDTA, 0.5 mM phenylmethylsulfonyl fluoride (PMSF), and 0.5 mM DTT] with a glass Dounce homogeniser (Tight type, Wheaton, Millville, NJ). The resulting suspension was stirred gently with a magnetic stirring bar for 30 min and then centrifuged for 30 min at  $25,000 \times g$ . The supernatant was dialysed against 50 volumes of buffer D [20 mM HEPES (pH 7.9), 20% (v/v) glycerol, 0.15 M NaCl, 0.2 mM EDTA, 0.5 mM phenylmethylsulfonyl fluoride (PMSF), and 0.5 mM DTT] for 5 h. The dialysate was centrifuged at  $25,000 \times g$  for 20 min and the resulting precipitate was discarded. The supernatant, containing nuclear extract, was frozen as aliquots in liquid nitrogen and stored at -80°C.

#### **GST fusion protein purification, *in vitro* transcription and translation**

GST, GST-POZFBI-1, and GST-ZFFBI-1 proteins were prepared from *E. coli* BL21 (DE3) transformed with the pGEX4T series GST, GST-POZFBI-1, and GST-ZFFBI-1 protein expression plasmids. *E. coli* cultures were induced with 0.5 mM isopropyl-1-thio-D-galactopyranoside (IPTG) for 4 h at 37°C. The cells were lysed in a buffer containing 1× PBS, 1 mM PMSF, 2 mM EDTA, and 0.2 mg/ml lysozyme, and sonicated 3-5 times at 0.5 cycle and 50% amplitude (Dr. Hielscher GmbH, Germany) to prepare lysates. The recombinant proteins were purified with glutathione-agarose 4 beads by affinity chromatography (Pepton, Daejeon, Korea). The purified proteins were resolved with 12% SDS-PAGE to quantitate and assess purity. Aliquots of the protein-agarose bead complex were used in GST-fusion protein pull down assays.

MBD3 was prepared *in vitro* by incubating 1 µg of pcDNA3.0 expression plasmid DNA with TNT Quick-coupled Transcription/Translation Extract (Promega, Madison, WI) containing 40 µl of TNT Quick Master Mix and 2 µl of [<sup>35</sup>S]-methionine (1175.0 Ci/mol, PerkinElmer) at 30°C for 90 min. Polypeptide expression level was analysed by running 3 µl of the total mixture on a 10% SDS-PAGE.

#### **GST fusion protein pull-down assays**

The purified GST fusion proteins (5 µg) were incubated with GSH-agarose (Sigma, St. Louis, MO) for 1 h in HEMG buffer [40 mM HEPES, pH 7.9, 100 mM KCl, 0.2 mM EDTA, 5 mM MgCl<sub>2</sub>, 0.1% Nonidet P-40, 10% glycerol, 1.5 mM dithiothreitol, and 1 tablet/50 ml of a protease inhibitor mixture (Roche, Mannheim, Germany)] at 4°C for 1 h. After the agarose-GST protein complexes were washed

three times with 1 ml of cold HEMG buffer, 10  $\mu$ l of the *in vitro* translated MBD3 was added and incubated in HEMG buffer at 4°C for 4 h. The reaction mixtures were centrifuged at  $3,000 \times g$  at 4°C, the supernatants were removed, and the pellets were washed five times with cold HEMG buffer. The bound proteins were separated by a 10% SDS-PAGE. The SDS-PAGE gel was dried and exposed to X-ray film using an image-intensifying screen (Kodak, Rochester, NY).

### **Immunofluorescence assay**

HeLa cells grown on coverslips (Sunshine Works, Seoul, Korea) were washed with cold PBS and fixed in 97:3 cold methanol/formaldehyde for 20 min at -20°C. Cells were permeabilised in 0.2% Triton X-100, washed with PBS, and were incubated in 5% normal horse serum for blocking. Cells were incubated with the mouse anti-FLAG primary antibody for 2 h at room temperature, rinsed, and further incubated with FITC-conjugated anti-mouse IgG secondary antibody for 1 h at room temperature. For double staining, cells were fixed again with 3.7% formaldehyde, incubated with blocking solution, and incubated with a different primary antibody (rabbit anti-His antibody), rinsed, and incubated with secondary antibody (anti-rabbit antibody conjugated with Rhodamine. Cells were then washed, and a final wash was performed in a solution containing 1 mg/ml 4, 6-diamidino-2-phenylindole. Cells were mounted on glass slides with mounting medium [90% (v/v) glycerol, 1 mg/ml p-phenylenediamine, and 0.02% sodium azide] and examined with LSM 510 confocal laser scanning microscope (Carl Zeiss, Oberkochen, Germany).

### **Oligonucleotide pull-down assay**

HEK293 cells transfected with pcDNA3.0 or pcDNA3-FLAG-FBI-1 expression vector were cultured for 48 h. HEK293 cells were lysed in HKMG buffer (10 mM HEPES, pH 7.9, 100 mM KCl, 5 mM MgCl<sub>2</sub>, 10% glycerol, 1 mM dithiothreitol, and 0.5% Nonidet P-40). Cellular extracts were pre-cleared with streptavidin-agarose beads (Thermo, Rockford, IL) for 1 h, and incubated with 1  $\mu$ g of biotin labeled FRE and Me-FRE (see Materials and Methods) for 16 h. To collect proteins bound to FRE or Me-FRE, the mixtures were incubated with streptavidin agarose beads for 2 h, washed with HKMG buffer, and precipitated by centrifugation. The precipitates were separated by SDS-PAGE and was analyzed by Western blotting assay using anti-FBI-1, anti-MBD3 and anti-GAPDH antibodies.

### **EMSA (electro-mobility shift assay)**

EMSAs were carried out as described previously (1). Oligonucleotide sequences used are as follows; FRE (forward, 5'-GATCCGAGCGCGGGTCCCGCCTC-3'; reverse, 5'-GATCGAGGCGGGACCCGCGCTCG-3'). Methylated oligonucleotide probes were synthesized by

Integrated DNA Technologies (Coralville, IA). Methylated oligonucleotide probes used are as follows; Me-FRE (forward, 5'- GATC/5-Methyl-dC/GAG/5-Methyl-dC/G/5-Methyl-dC/GGGTCC/5-Methyl-dC/GCCTC-3'; reverse, 5'- GATCGAGG/5-Methyl-dC/GGGACC/5-Methyl-dC/G/5-Methyl-dC/GCT/5-Methyl-dC/G-3'). The FRE, and methylated FRE probes were labeled using  $^{32}\text{P}$ - $\gamma$ -ATP and polynucleotide kinase. Each EMSA binding reaction was carried out for 30 min in 20  $\mu\text{l}$  of binding buffer (10 mM HEPES pH 7.9, 60 mM KCl, 0.005 mM  $\text{ZnCl}_2$ , 1 mM dithiothreitol, 1% BSA, and 7% glycerol) and 200 ng recombinant GST-ZF FBI-1. The protein-DNA complexes were resolved with 4% non-denaturing PAGE at room temperature in 0.5X TBE (89mM TBE, pH 8.3) at 150 V for 2 h. The gels were exposed to X-ray film with a Kodak intensifying screen.

### **Mammalian two-hybrid reporter assays**

Monkey kidney cells (CV-1) were grown in DMEM supplemented with 10% FBS (Invitrogen, Carlsbad, CA). The cells were inoculated into 6-well culture dishes at a density of  $5 \times 10^5$  cells/well. After the cells were grown for 16 h, they were transiently transfected with the pCMX-GAL4-ZFFBI-1 (bait), VP16 fusion protein expression plasmids (pCMX-VP16-BCoR, pCMX-VP16-NCoR, pCMX-VP16-mSin3A, and pCMX-VP16-SMRT), and the reporter plasmid (pG5-*Luc*) using the Lipofectamine reagent (Invitrogen, Carlsbad, CA). Cells were cultured for an additional 36 h. The cells were harvested and lysed in 100  $\mu\text{l}$  of reporter lysis buffer (Promega, Madison, WI) and analysed for luciferase activity. Reporter assays were repeated 3-4 times and performed with 5  $\mu\text{l}$  of cell extract, using 50  $\mu\text{l}$  of luciferase assay reagent (Promega, Madison, WI) on a luminometer (Microplate Luminometer LB 96V, EG&G Berthold, Natick, MA). Luciferase activities were normalized with cotransfected  $\beta$ -galactosidase activity.

### **Knockdown of gene expression by siRNA**

Two siRNA designed to knockdown each of the following genes expression, glyceraldehyde-3-phosphate dehydrogenase (GAPDH), FBI-1, MBD3, BCoR, and HP1 were purchased from Bioneer Inc. (Daejeon, Korea). siRNA (200 pmoles) was transfected into  $6 \times 10^5$  HEK293 cells using Lipofectamin RNAiMAX (Invitrogen, Carlsbad, CA) and was transfected into  $5 \times 10^5$  HDFn cells using the Neon Transfection System (Invitrogen, Carlsbad, CA). Total RNA was prepared from the cells using TRIzol (Invitrogen, Carlsbad, CA) and analysed for knockdown efficiency by RT-qPCR or semi-quantitative PCR. To test the knockdown efficiency at protein level, total cell extracts were prepared by lysis in RIPA buffer (50 mM Tris-HCl pH 8.0, 1% NP-40, 0.25% sodium deoxycholic acid, 150 mM NaCl, 1 mM EGTA and complete mini-protease cocktail). The cell lysates (50  $\mu\text{g}$ ) were analyzed by Western blotting analysis. Sequences of siRNA targeting GAPDH, FBI-1, MBD3, BCoR,

and HP1 mRNA are described Supplementary Table I.

### **Transcriptional analysis of the *CDKN1A*-Luc promoter**

Two *CDKN1A*-Luc promoter reporter fusion plasmids (with -2.4 kb or -133 bp upstream regulatory sequence), pcDNA3-FBI-1 and pCMV-LacZ, were transiently transfected into HEK293 cells using Lipofectamine Plus reagent. After 48 h of incubation, cells were harvested and analysed for luciferase activity. The assays were repeated 3 times. The reporter activity was normalised with co-transfected  $\beta$ -galactosidase activity or protein concentration.

### **Two-dimensional gel electrophoresis**

Isoelectric focusing (IEF) was performed using pre-cast immobilised pH gradient strips (24 cm, pH 3-10, linear, Amersham Biosciences, Uppsala, Sweden). 500  $\mu$ g of proteins were solubilised in rehydration buffer (9 M urea, 2% CHAPS, 60 mM DTT, 0.5% pharmalyte, pH 3-10, 0.002% bromophenol blue) and protein samples were loaded on IPG strips and rehydrated overnight. The IEF gel was run for a total of 36 kVh during which the voltage was increased linearly from 100 to 8000 V over 6 h and then, maintained for 3 h at 8000 V. After IEF, strips were first equilibrated for 15 min in a reducing solution (50 mM Tris-HCl, pH 8.8, 6 M urea, 30% (v/v) glycerol, 2% (w/v) SDS, 1% (w/v) DTT), and then for a further 15 min in an alkylating solution, which was identical in make-up to the reducing solution except that 2.5% (w/v) iodoacetamide was substituted for DTT. A second gel electrophoresis was performed using a standard sodium dodecyl sulfate-polyacrylamide gel electrophoresis (SDS-PAGE) protocol, using the Ettan DALT 6 System (Amersham Biosciences, Uppsala, Sweden). SDS-PAGE was run on 12% polyacrylamide gel, and gels were visualised by silver staining.

### **In-gel digestion and mass spectrometry**

Silver-stained gel spots were excised, destained by reduction using a solution of 30 mM potassium ferricyanide/100 mM sodium thiosulfate, and washed with distilled water. The gel pieces were then incubated with 0.2 M  $\text{NH}_4\text{HCO}_3$  for 20 min, dehydrated, shrunk with 100% acetonitrile twice, and dried by vacuum centrifugation. For in-gel digestion with trypsin, gel pieces were rehydrated in digestion buffer containing 0.05 M  $\text{NH}_4\text{HCO}_3$  and 10 ng/ $\mu$ l of modified porcine trypsin (Promega, Madison, WI) at 4°C for 45 min. Excess supernatant was then removed, and the gel pieces were covered with 30  $\mu$ l of 0.05 M  $\text{NH}_4\text{HCO}_3$  buffer. Digestion was performed overnight at 37°C, and after in-gel tryptic digestion, tryptic peptides were extracted from the gel particles and trifluoroacetic acid (TFA) was added to a final concentration of 0.1% to prevent additional digestion.

Samples were desalted using a GELoader tip (Eppendorf AG, Hamburg, Germany) and packed with POROS 20 R2 resin (Applied Biosystems Inc., Foster City, CA). Peptide binding and washing were performed using 0.1% TFA in water. To produce the MALDI sample matrix solution,  $\alpha$ -cyano-4-hydroxy cinnamic acid was dissolved in a solution containing 70% acetonitrile and 0.1% TFA at concentration of 5 g/l. Elution was performed with 1  $\mu$ l of sample matrix solution and the eluted peptides were directly spotted onto the target plate.

Protein identification was carried out using peptide mass fingerprinting (PMF) and MS/MS analysis on the MALDI-TOF/TOF mass spectrometer system (ABI 4700 Proteomics Analyzer; Applied Biosystems, Foster City, CA). External calibrations using a 4700 calibration mixture (Applied Biosystems, Foster City, CA) in MS mode and glu-fibrinopeptide B fragment (m/z 1570.68) in MS/MS mode, respectively, were performed with a mass tolerance of 50 ppm. MS data and MS/MS data were acquired using 1000 and 3000 shots of a 355 nm Nd:YAG laser with a fixed intensity in positive ion reflector mode, respectively. In MS/MS analysis, CID was performed using air as the collision medium. The MS and MS/MS spectra were processed for protein identification with GPS Explorer<sup>TM</sup> software (Applied Biosystems, Foster City, CA) that adopted the MASCOT search algorithm (Matrix Science Ltd., Boston, MA) using the NCBI protein sequence database (<http://www.ncbi.nlm.nih.gov/entrez>) imbedded system.

**SUPPLEMENTARY TABLE 1. NUCLEOTIDE SEQUENCES OF siRNA.**

|                                  |                                  |
|----------------------------------|----------------------------------|
| <b>Negative Control, SN-1013</b> |                                  |
| <b>Sense</b>                     | <b>CCUACGCCACCAAUUUCGU(dTdT)</b> |
| <b>Anti Sense</b>                | <b>ACGAAAUUGGUGGCGUAGG(dTdT)</b> |
| <b>HP1 #1 1025971</b>            |                                  |
| <b>Sense</b>                     | <b>UCUCAACAGUGCCGAUGA(dTdT)</b>  |
| <b>Anti Sense</b>                | <b>UCAUCGGCACUGUUUGAGA(dTdT)</b> |
| <b>HP1 #2 1025966</b>            |                                  |
| <b>Sense</b>                     | <b>GCGCGUGGUUAAGGGACAA(dTdT)</b> |
| <b>Anti Sense</b>                | <b>UUGUCCCUUAACCACGCGC(dTdT)</b> |
| <b>ZBTB7A #1 1165418</b>         |                                  |
| <b>Sense</b>                     | <b>CUCUGAGCGGACGUUAAAA(dTdT)</b> |
| <b>Anti Sense</b>                | <b>UUUUAACGUCCGCUCAGAG(dTdT)</b> |
| <b>ZBTB7A #2 1165422</b>         |                                  |
| <b>Sense</b>                     | <b>CCUCGCAAUAAAACCAACU(dTdT)</b> |
| <b>Anti Sense</b>                | <b>AGUUGGUUUUAUUGCGAGG(dTdT)</b> |
| <b>MBD3 #1 1092749</b>           |                                  |
| <b>Sense</b>                     | <b>GCUUCCCAUCUCCCUAGAA(dTdT)</b> |
| <b>Anti Sense</b>                | <b>UUCUAGGGAGAUGGGAAGC(dTdT)</b> |
| <b>MBD3 #2 1092753</b>           |                                  |
| <b>Sense</b>                     | <b>CACAGUCGAGGCACGUCAU(dTdT)</b> |
| <b>Anti Sense</b>                | <b>AUGACGUGCCUCGACUGUG(dTdT)</b> |
| <b>BCoR #1 1012083</b>           |                                  |
| <b>Sense</b>                     | <b>CGUUACCAAAGACGUCACA(dTdT)</b> |
| <b>Anti Sense</b>                | <b>UGUGACGUCUUUGGUAACG(dTdT)</b> |
| <b>BCoR #2 1012084</b>           |                                  |
| <b>Sense</b>                     | <b>GACUAGACGCUUGAAGCAA(dTdT)</b> |
| <b>Anti Sense</b>                | <b>UUGCUUCAAGCGUCUAGUC(dTdT)</b> |



## SUPPLEMENATRY FIGURES & LEGENDS

**Supplemenatry Figure S1. Related to Figure 1. MBD3 is a component of the nuclear protein complex containing FLAG-FBI-1.** (A) Control, 2D IEF/12% SDS-PAGE gel analysis of the immunoprecipitate. The nuclear extract prepared from HEK293-TREx control cells was immunoprecipitated using the anti-FLAG M2-Agarose antibody. (B) 2D gel of the immunoprecipitate of the nuclear protein complex prepared from the HEK293-TREx-FLAG-FBI-1 cells. Nuclear lysates were immunoprecipitated using the anti-FLAG M2-Agarose antibody and the immunoprecipitates were separated by 2D IEF (pH 3-10)/12% SDS-PAGE and stained with a silver staining solution. The spots that showed differential expression were isolated, digested with trypsin and subjected to MALDI-TOF mass spectrometry analysis. The black bordered circles were labelled with the name of the identified protein.

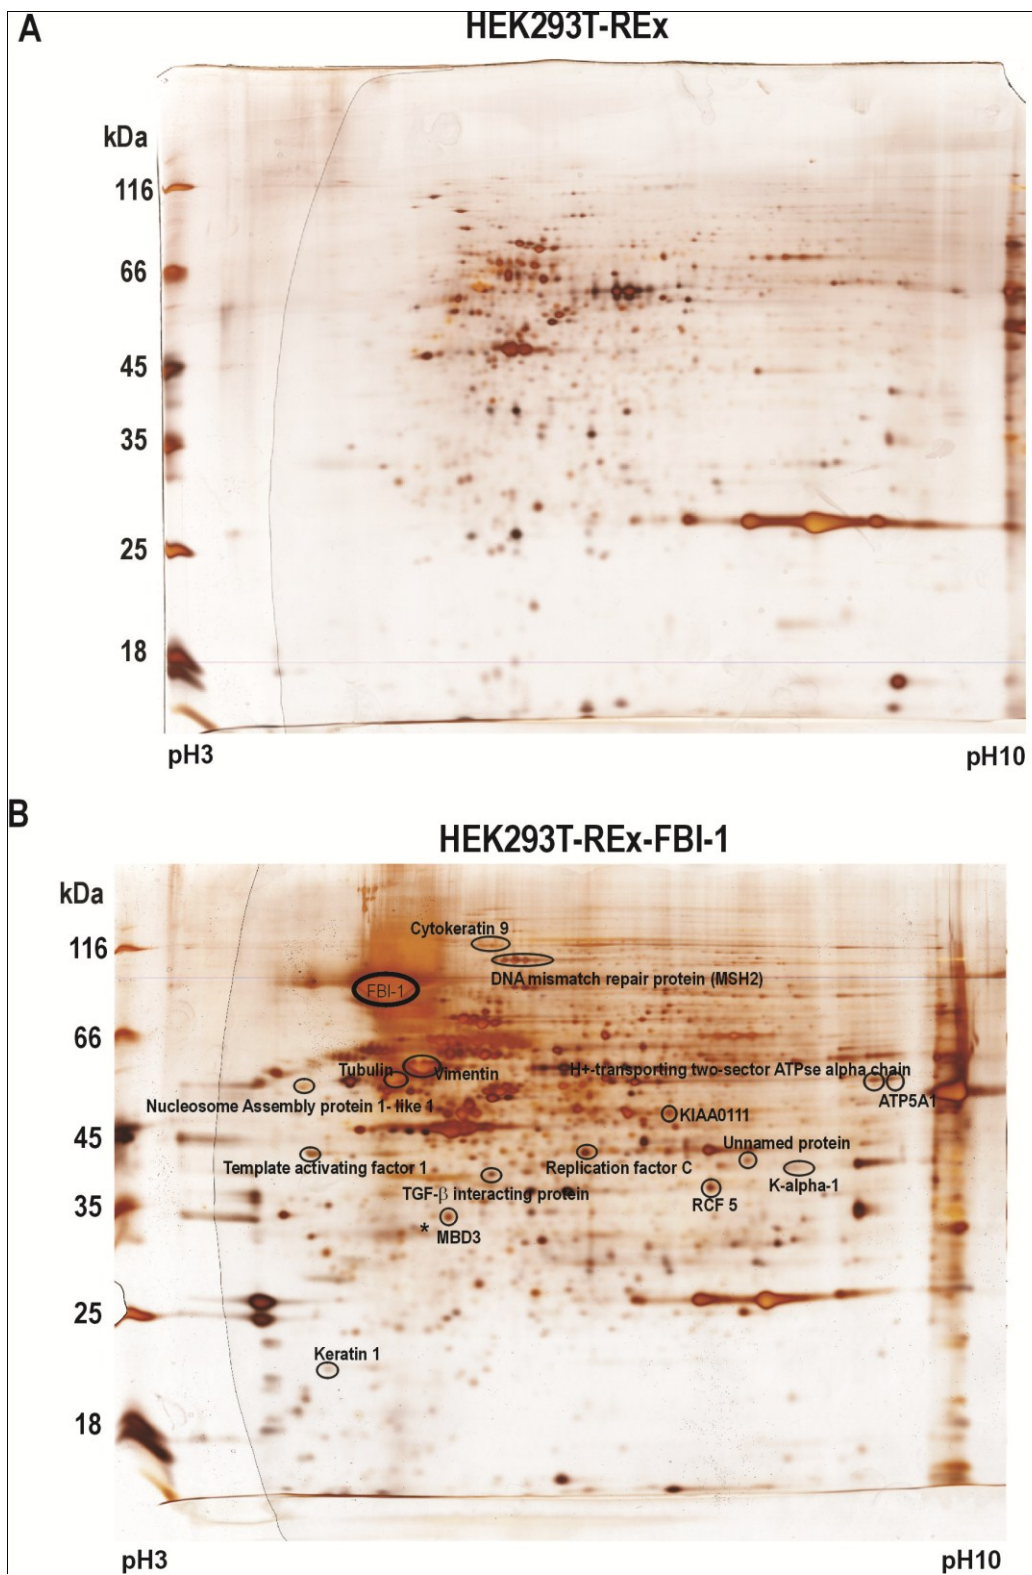

**Supplementary Figure S2. Related to Figure 1. MALDI-TOF mass spectrometry analysis of the 34 kDa protein spot.** (A) MALDI mass spectrum of the 34 kDa protein band that was immunoprecipitated with FLAG-FBI-1. (B) Peptide mass fingerprinting to identify the protein by MALDI-TOF mass spectrometry. Eight polypeptides that showed significant identity to MBD3 upon amino acid sequencing are listed. The 34 kDa protein was identified as MBD3 using a MASCOT database search.

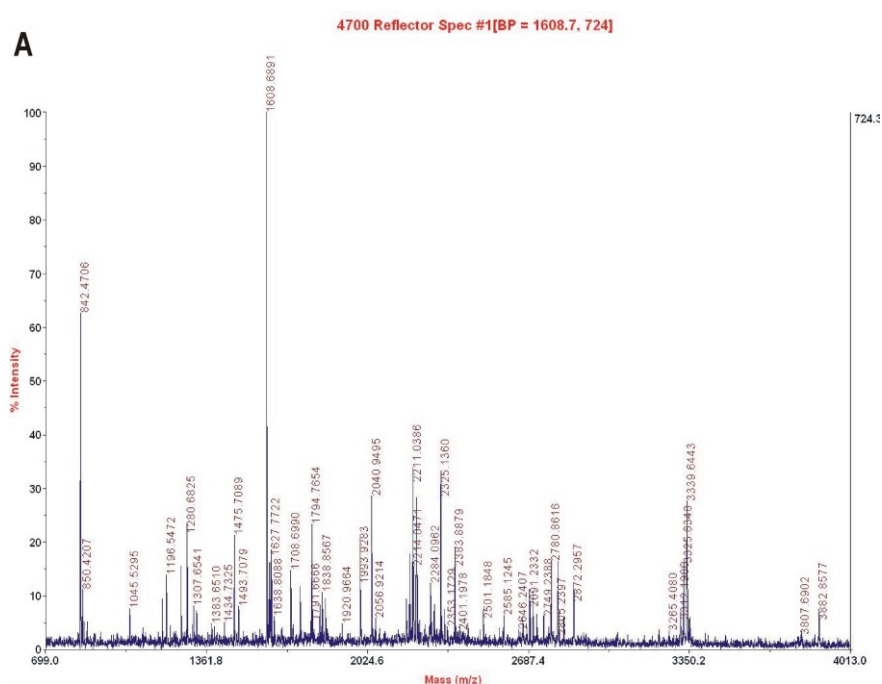

**B**

| a.a. number sequenced | peptide sequence    |
|-----------------------|---------------------|
| 20-33                 | YLGGSMDLSTFDFR      |
| 59-70                 | GKPDNLALPVR         |
| 104-109               | QLFWEK              |
| 110-125               | KLSGLNAFDIAEELVK    |
| 171-184               | NPGVWLNTTQPLCK      |
| 185-194               | AFMVTDEDIR          |
| 196-205               | QEELVQQVRK          |
| 206-224               | RLEEALMADMLAHVEELAR |

Supplementary Figure S2. *Choi et al., 2012*

**Supplementary Figure S3. Related to Figures 2E; 4E; 5H, I; 6F; 8. Semi-quantitative PCR analysis of knock-down of FBI-1, MBD3, BCoR, and HP1 mRNA expression by siRNA treatment.** (A) Semi-quantitative RT-PCR analysis of p21 mRNA expression in the HEK293 cells transfected with various combinations of siRNA designed to knock-down endogenous FBI-1, MBD3 and HP1 mRNA expression. Knock-down of FBI-1, and/or MBD3 increases endogenous p21 mRNA expression. Knock-down of HP1 alone increases p21 mRNA expression. Knock-down of HP1 in combination with knock-down of both MBD3 and FBI-1 increases p21 mRNA expression. (B) Semi-quantitative RT-PCR analysis of mRNA expression after treatment with two different siRNA designed knock-down FBI-1, MBD3, BCoR, and HP1. mRNA are degraded effectively by siRNA. Each siRNA targeting FBI-1, MBD3, BCoR, or HP1 mRNA does not affect the mRNA levels of other mRNA. (C) Semi-quantitative RT-PCR analysis of mRNA expression after treatment with siRNA designed to knock-down FBI-1, MBD3, and BCoR.

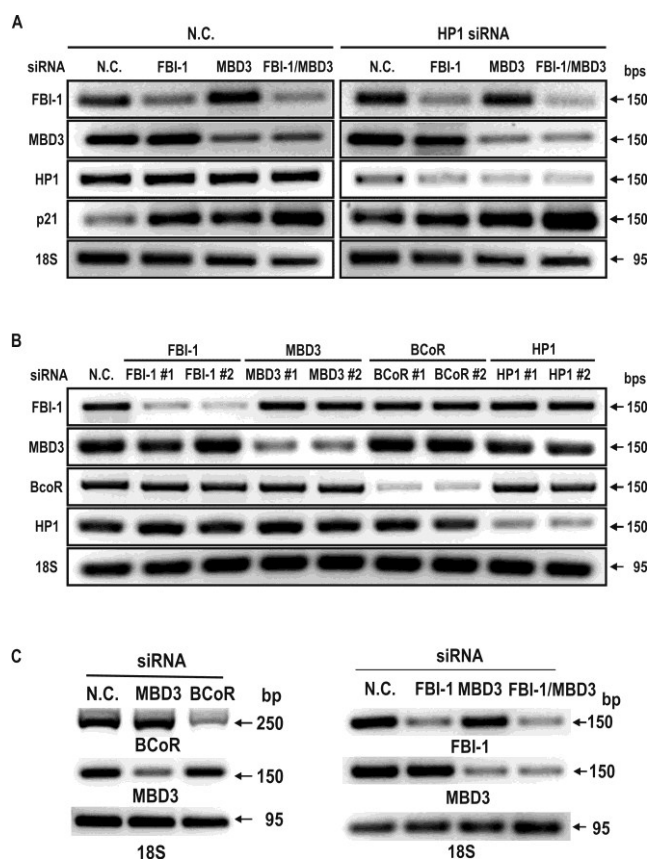

**Supplementary Figure S3. Choi et al., 2012**

**Supplementary Figure S4. Related to Figure 8. MBD3 and FBI-1 increase recruitment of DNMT3b at the proximal promoter of *p21WAF/CDKN1A* and significantly affect epigenetic histone marks.** (A, B) qChIP assays of DNMT3b binding at the human *CDKN1A* gene promoter in HEK293 cells. HEK293 cells were transfected with ectopic expression vector or knockdown siRNA of MBD3 and/or FBI-1. Chromatin was fixed and DNMT binding was analyzed by qChIP. Knockdown of MBD3 or BCoR decreases DNMT3b binding. (C, D) qChIP assays of acetylated H3 and H4, H3K4-Me3, and H3K9-Me3 around the endogenous proximal *CDKN1A* promoter. HEK293 cells were transfected with FBI-1 and/or MBD3 expression vector or siRNA targeting FBI-1 and/or MBD3.

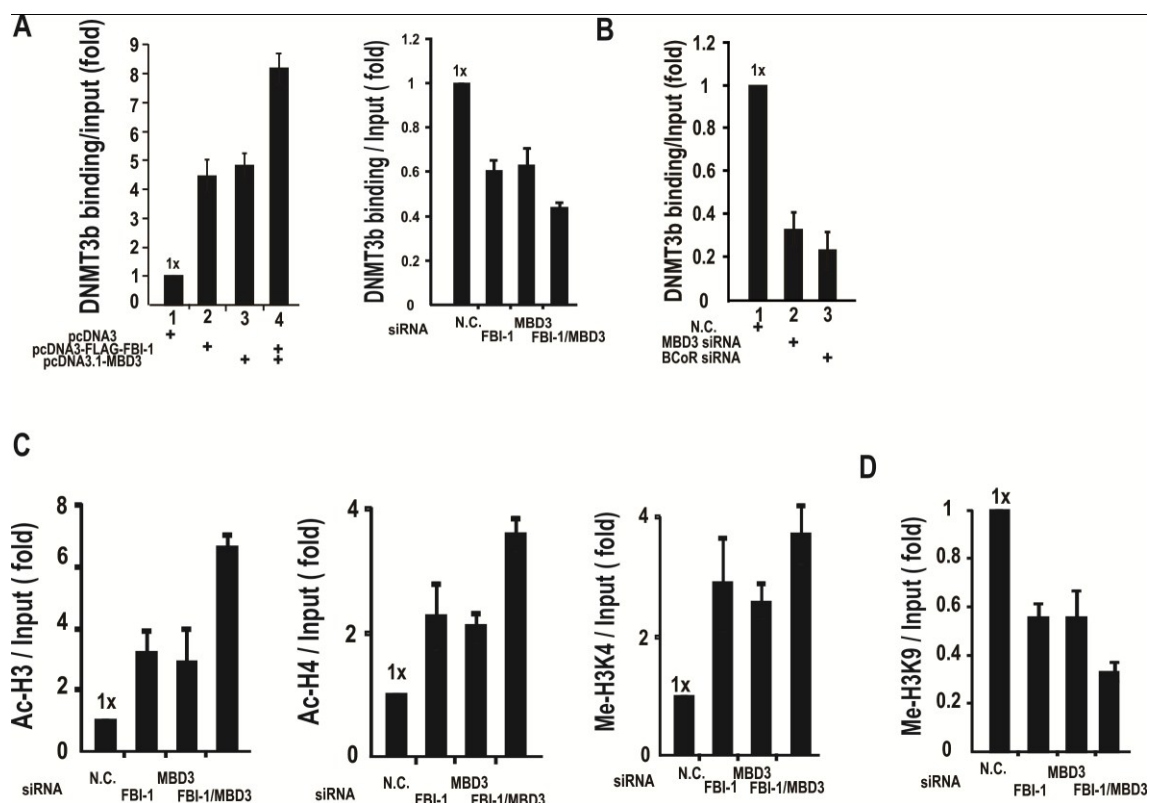

**Supplementary Figure S4. Choi et al., 2012**

**Supplementary Figure S5. Related to Figure 8. qChIP assays at the proximal promoter of *p21WAF/CDKN1A*. HP1 binding is affected by MBD3, FBI-1, but HP1 does not affect binding of FBI-1 and MBD3. HP1 weakly affects the binding of DNMTs, but significantly affects epigenetic histone marks. (A) qChIP assays of HP1 binding to the endogenous *CDKN1A* proximal promoter after knockdown of FBI-1 and/or MBD3. (B) qChIP assays. Knock-down of HP1 does not affect binding of FBI-1, MBD3, Mi-2/NuRD-HDAC complex. (C) qChIP assays. Knock-down of HP1 only weakly affects DNMTs binding. (D) qChIP assays. Knock-down of HP1 increases acetylated histones H3/H4 and H3K4-Me3, but decreases H3K9-Me3, a histone marker of transcription repression.**

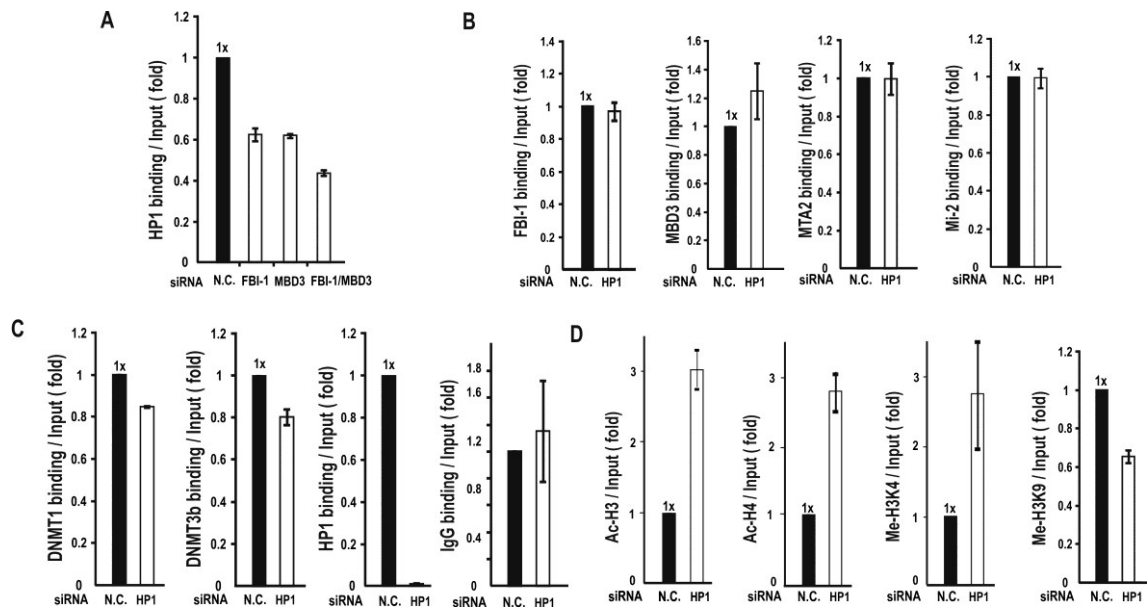

**Supplementary Figure S5. Choi et al., 2012**

**Supplementary Figure S6. Related to Figure 6A. TSA and 5-aza-2'-dC treatment do not affect the expression of endogenous FBI-1 and/or MBD3 expression at mRNA and protein levels.** (A, B) Western blot and RT-qPCR assays of endogenous FBI-1 and MBD3 expression in the HEK293 cells treated with TSA (200 nM) or 5-aza-2'-dC (2 uM).

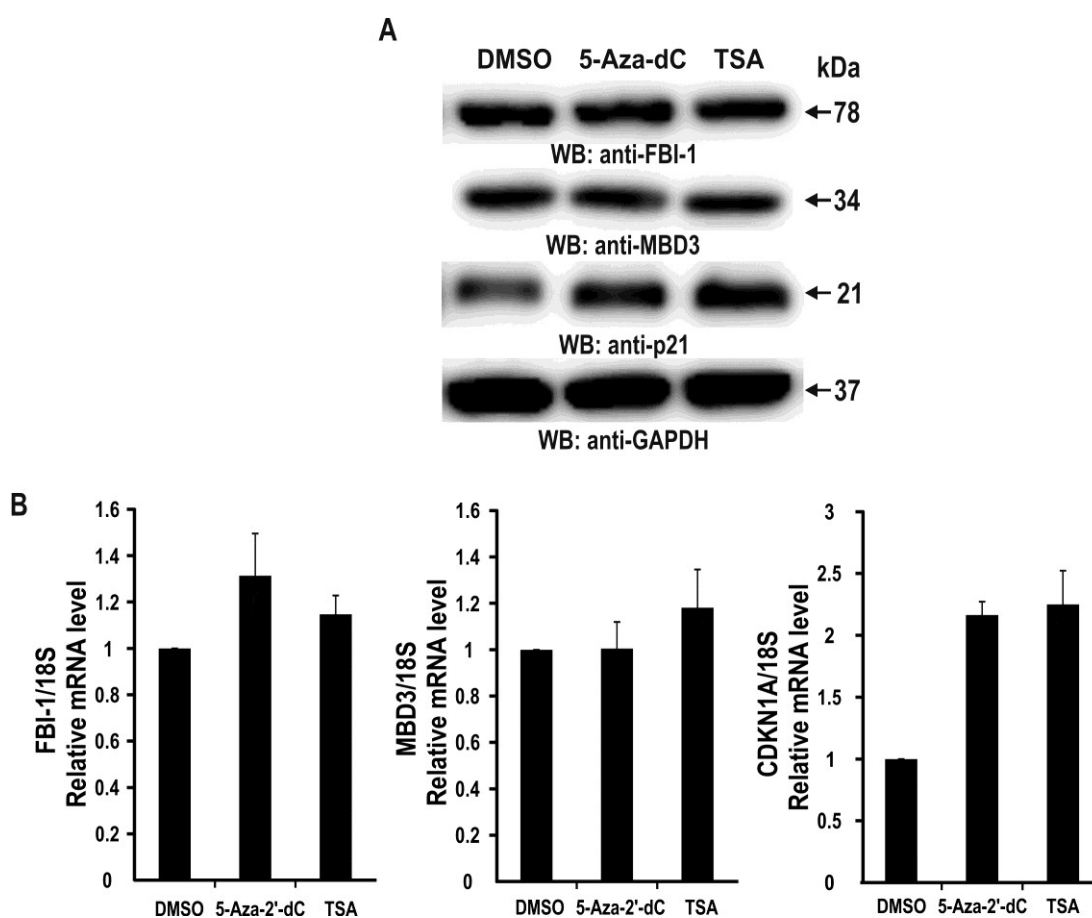

**Supplementary Figure S6. Choi et al., 2012**

**Supplementary Figure S7. Related to Figure 6(G, H). The proximal *CDKN1A* promoter can be repress by DNA methylation; FBI-1 and MBD3 are important in DNA methylation. (A, B) Bisulfite DNA sequencing assays. Shown is the map of methylated cytosines in the *CDKN1A* promoter. Cells were transfected with expression vectors or siRNA knocking down FBI-1 and/or MBD3, and DNA was prepared for bisulfite sequencing. Individual PCR products were cloned, and 20 clones were sequenced. Filled circles indicate methylated CpG sites; empty circle indicate unmethylated CpG sites.**

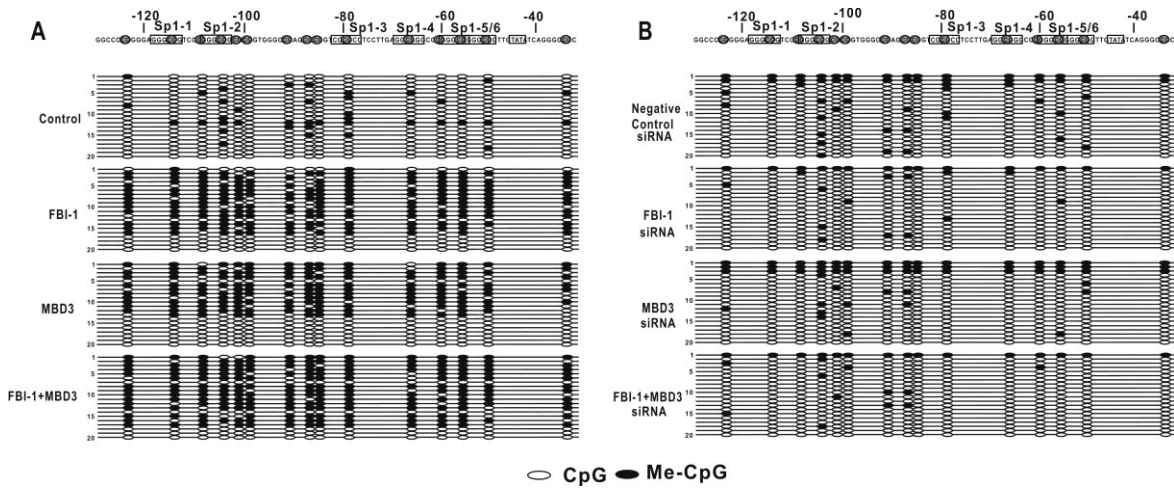

**Supplementary Figure S7. Choi et al., 2012**



**Supplementary Figure S8. Related to Figure 6E. FBI-1 overexpression combined with knock-down of MBD3 significantly affects the methylation of proximal *CDKN1A* promoter.** (A) Me-DIP assays of DNA methylation at the proximal *CDKN1A* promoter in HEK293 cells with ectopic FBI-1 expression and/or knocked-down MBD3. Me-PC, methylation positive control; Me-NC, methylation negative control; GAPDH, GAPDH promoter; Alpha X1, X-linked alpha-satellites. (B) RT-qPCR analysis of the expression of FBI-1, MBD3, and p21 mRNA in HEK293 cells transfected with ectopic FBI-1 expression and/or knocked-down MBD3. Ectopic FBI-1 and/or MBD3 decrease endogenous p21 expression.

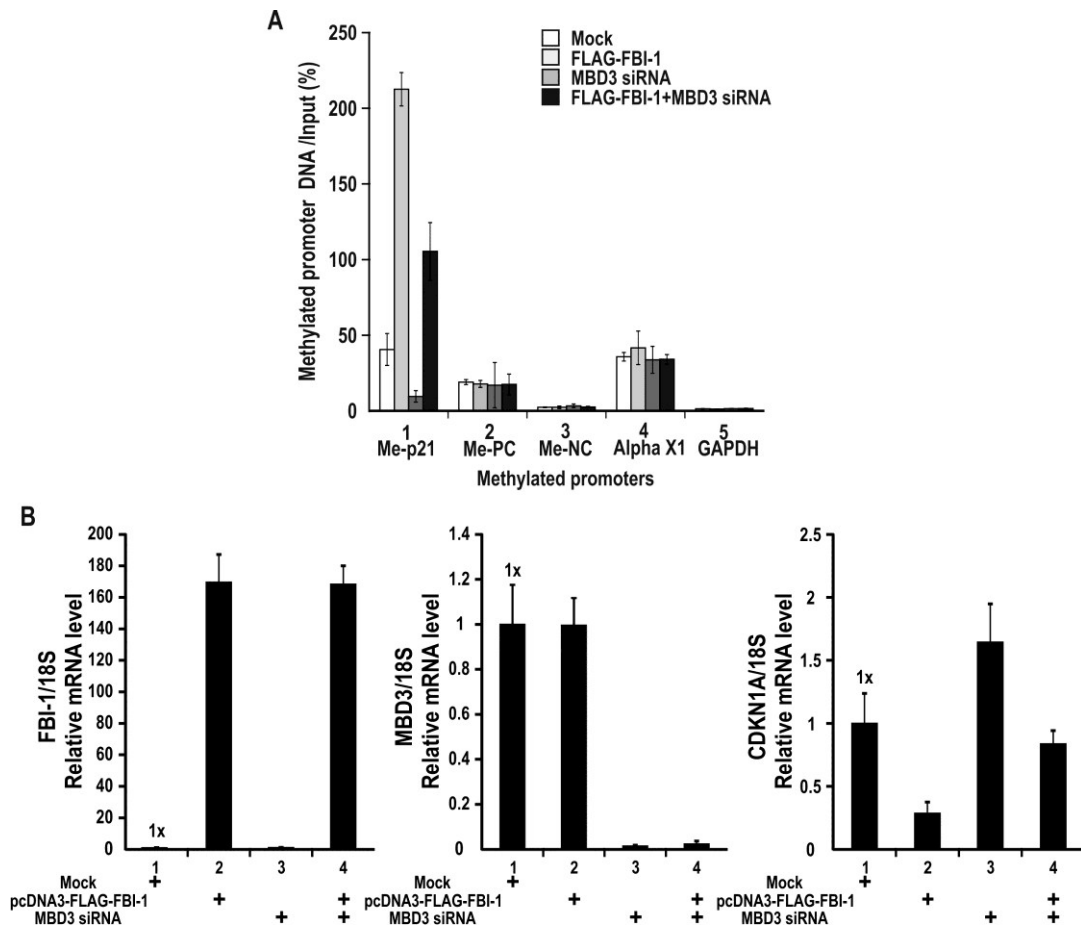

**Supplementary Figure S8. Choi et al., 2012**

**Supplementary Figure S9. Related to Figure 5I. BCoR does not affect interaction between FBI-1 and MBD3.** Co-immunoprecipitation and western blot analysis of FBI-1, MBD3, and BCoR. HEK293 cells were transfected with BCoR siRNA and immunoprecipitated using an anti-FBI-1 antibody. The immunoprecipitates were analyzed for the presence of FBI-1, MBD3, and BCoR. GAPDH, Loading control.

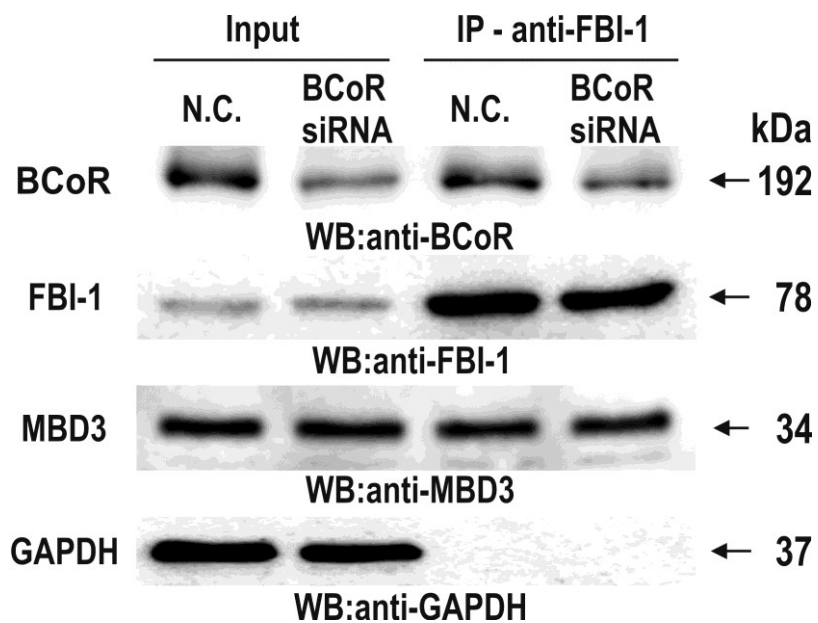

**Supplementary Figure S9. Choi et al., 2012**
